# Supplementary material
Source: PubMed Central journal article supplement (PMC2755883)
Supplement: supp_M109.015040_Suppdata.pdf [file supp_M109.015040_Suppdata.pdf]

1 M A N G G G G G G G S S G G G G G G G G G S G L R M S S N I H A M N L S L D A S S S S S S S S S S S S S mS1o1  
1 M A N G G G G G G G - - - - - G G G G S S L R M S S N I H A M H L S L D A S S S S S S S S S S S S S bS1o1

51 S S S S S S S S S S V H E P K M D A L I I P V T M E V P C D S R G Q R M W W A F L A S S M V T F F G mS1o1  
44 S S S S - - - - S V H E P K M D A L I I P V T M E V P C D S R G Q R M W W A F L A S S M V T F F G bS1o1

S0

101 G L F I I L L W R T L K Y L W T V C C H C G G K T K E A Q K I N N G S S Q A D G T L K P V D E K E E mS1o1  
89 G L F I I L L W R T L K Y L W T V C C H C G G K T K E A Q K I N N G S S Q A D G T L K P V D E K E E bS1o1

151 V V A A E V G W M T S V K D W A G V M I S A Q T L T G R V L V L V L V F A L S I G A L V I Y F I D S S mS1o1  
139 T V A A E V G W M T S V K D W A G V M I S A Q T L T G R V L V L V L V F A L S I G A L V I Y F I D S S bS1o1

S1

201 N P I E S C Q N F Y K D F T L Q I D M A F N V F F L L Y F G L R F I A A N D K L W F W L E V N S V V mS1o1  
189 N P I E S C Q N F Y K D F T L Q I D M A F N V F F L L Y F G L R F I A A N D K L W F W L E V N S V V bS1o1

S2

251 D F F T V P P V F V S V Y L N R S W L G L R F L R A L R L I Q F S E I L Q F L M I L K T S N S I K L mS1o1  
239 D F F T V P P V F V S V Y L N R S W L G L R F L R A L R L I Q F S E I L Q F L M I L K T S N S I K L bS1o1

S3 S4

301 V N L L S I F I S T W L T A A G F I H L V E N S G D P W E N F Q N N Q A L T Y W E C V Y L L M V T M mS1o1  
289 V N L L S I F I S T W L T A A G F I H L V E N S G D P W E N F Q N N Q A L T Y W E C V Y L L M V T M bS1o1

S5 P-

351 S T V G Y G D V Y A K T T L G R L F M V F F I L G G L A M F A S Y V P E I I E L I G N R K K Y G G S mS1o1  
339 S T V G Y G D V Y A K T T L G R L F M V F F I L G G L A M F A S Y V P E I I E L I G N R K K Y G G S bS1o1

S6

401 Y S A V S G R K H I V V C G H I T L E S V S N F L K D F L H K D R D D V N V E I V F L H N I S P N L mS1o1  
389 Y S A V S G R K H I V V C G H I T L E S V S N F L K D F L H K D R D D V N V E I V F L H N I S P N L bS1o1

RCK1

451 E L E A L F K R H F T Q V E F Y Q G S V L N P H D L A R V K I E S A D A C L I L A N K Y C A D P D A mS1o1  
439 E L E A L F K R H F T Q V E F Y Q G S V L N P H D L A R V K I E S A D A C L I L A N K Y C A D P D A bS1o1

RCK1

501 E D A S N I M R V I S I K N Y H P K I R I I T Q M L Q Y H N K A H L L N I P S W N W K E G D D A I C mS1o1  
489 E D A S N I M R V I S I K N Y H P K I R I I T Q M L Q Y H N K A H L L N I P S W N W K E G D D A I C bS1o1

RCK1

551 L A E L K L G F I A Q S C L A Q G L S T M L A N L F S M R S F I K I E E D T W Q K Y Y L E G V S N E mS1o1  
539 L A E L K L G F I A Q S C L A Q G L S T M L A N L F S M R S F I K I E E D T W Q K Y Y L E G V S N E bS1o1

RCK1

601 M Y T E Y L S S A F V G L S F P T V C E L C F V K L K L L M I A I E Y K S A N R E S R I L I N P G N mS1o1  
589 M Y T E Y L S S A F V G L S F P T V C E L C F V K L K L L M I A I E Y K S A N R E S R I L I N P G N bS1o1

RCK1

651 H L K I Q E G T L G F F I A S D A K E V K R A F F Y C K A C H D D V T D P K R I K K C G C R R L E D mS1o1  
639 H L K I Q E G T L G F F I A S D A K E V K R A F F Y C K A C H D D I T D P K R I K K C G C K R L E D bS1o1

RCK1

701 E Q P P T L S P K K K Q R N G G M R N S P N T S P K L M R H D P L L I P G N D Q I D N M D S N V K K mS1o1  
689 E Q P S T L S P K K K Q R N G G M R N S P S S S P K L M R H D P L L I P G N D Q I D N M D S N V K K bS1o1

751 Y D S T G M F H W C A P K E I E K V I L T R S E A A M T V L S G H V V V C I F G D V S S A L I G L R mS1o1  
739 Y D S T G M F H W C A P K E I E K V I L T R S E A A M T V L S G H V V V C I F G D V S S A L I G L R bS1o1

RCK2

801 N L V M P L R A S N F H Y H E L K H I V F V G S I E Y L K R E W E T L H N F P K V S I L P G T P L S mS1o1  
789 N L V M P L R A S N F H Y H E L K H I V F V G S I E Y L K R E W E T L H N F P K V S I L P G T P L S bS1o1

RCK2

851 R A D L R A V N I N L C D M C V I L S A N Q N I D D T S L Q D K E C I L A S L N I K S M Q F D D S mS1o1  
839 R A D L R A V N I N L C D M C V I L S A N Q N I D D T S L Q D K E C I L A S L N I K S M Q F D D S bS1o1

RCK2

901 I G V L Q A N S Q G F T P P G M D R S S P D N S P V H G M L R Q P S I T T G V N I P I I T E L V N D mS1o1  
889 I G V L Q A N S Q G F T P P G M D R S S P D N S P V H G M L R Q P S I T T G V N I P I I T E L V N D bS1o1

RCK2

951 T N V Q F L D Q D D D D P D T E L Y L T Q P F A C G T A F A V S V L D S L M S A T Y F N D N I L T mS1o1  
939 T N V Q F L D Q D D D D P D T E L Y L T Q P F A C G T A F A V S V L D S L M S A T Y F N D N I L T bS1o1

1001 L I R T L V T G A T P E L E A L I A E E N A L R G G Y S T P Q T L A N R D R C R V A Q L A L L D G mS1o1  
989 L I R T L V T G A T P E L E A L I A E E N A L R G G Y S T P Q T L A N R D R C R V A Q L A L L D G bS1o1

1051 P F A D L G D G G C Y G D L F C K A L K T Y N M L C F G I Y R L R D A H L S T P S Q C T K R Y V I T mS1o1  
1039 P F A D L G D G G C Y G D L F C K A L K T Y N M L C F G I Y R L R D A H L S T P S Q C T K R Y V I T bS1o1

1101 N P P Y E F E L V P T D L I F C L M Q F D H N A G Q S R A S L S H S S H S S Q S S S K K S S S V H S mS1o1  
1089 N P P Y E F E L V P T D L I F C L M Q F D H N A G Q S R A S L S H S S H S S Q S S S K K S S S V H S bS1o1

1151 I P S T A N R P N R P K S R E S R D K Q N R K E M V Y R mS1o1  
1139 I P S T A N R Q N R P K S R E S R D K Q bS1o1

% Identities between Slo3 proteins (yellow) from six different species compared to  
 % Identities between Slo1 proteins (grey) from the same six species

m=mouse; h=human; b=bovine; dg=dog; pg=pig; ps=possum

|        | mSlo3 |       | hSlo3 |       | bSlo3 |       | dgSlo3 |        | pgSlo3 |        | psSlo3 |        |        |
|--------|-------|-------|-------|-------|-------|-------|--------|--------|--------|--------|--------|--------|--------|
| mSlo3  | 100   | 100   |       |       |       |       |        |        |        |        |        |        | mSlo1  |
| hSlo3  | 62.9  | 99.5  | 100   | 100   |       |       |        |        |        |        |        |        | hSlo1  |
| bSlo3  | 62.0  | 99.4  | 68.6  | 99.7  | 100   | 100   |        |        |        |        |        |        | bSlo1  |
| dgSlo3 | 64.4  | 97.6  | 71.3  | 98.0  | 71.0  | 98.1  | 100    | 100    |        |        |        |        | dgSlo1 |
| pgSlo3 | 62.3  | 99.4  | 70.0  | 99.6  | 76.5  | 99.8  | 73.7   | 98.0   | 100    | 100    |        |        | pgSlo1 |
| psSlo3 | 52.8  | 91.8  | 52.4  | 91.9  | 51.9  | 91.7  | 54.8   | 89.9   | 54.1   | 91.7   | 100    | 100    | psSlo1 |
|        |       | mSlo1 |       | hSlo1 |       | bSlo1 |        | dgSlo1 |        | pgSlo1 |        | psSlo1 |        |

Alignments were made with the Megalign module of DNASTar using the Clustal V method. Both the possum sequences were incomplete and began after the S0 motif. In addition, the possum Slo3 sequence was also missing approximately 40-50 amino acids at the C-terminal.
